# Supplementary material for: Carbon quantum dots for the detection of antibiotics and pesticides
Source: PubMed Central journal article supplement — J Food Drug Anal. 2020 Dec 1;28(4):539–57. doi: 10.38212/2224-6614.1269 (PMC9261805; doi:10.38212/2224-6614.1269), 2020-12-01
Supplement: jfda-28-04-539-s001.pdf [file jfda-28-04-539-s001.pdf]

## Research Highlights

- Carbon quantum dots (CQDs)-based detection for antibiotics and pesticides has been reviewed
- Unique optical and electrochemical properties of CQDs enable to develop different sensing strategies
- Current CQDs-based sensors lack specificity due to difficulty in structural fine-tuning
- Further studies are required to elucidate CQD structures for improving selectivity
